# Supplementary material
Source: PubMed Central journal article supplement (PMC2366195)
Supplement: NIHMS45665-supplement-01.pdf [file NIHMS45665-supplement-01.pdf]

## Supplementary data

### **Synthesis and in vitro Properties of Trimethylamine- and Phosphonate-substituted Carboranylporphyrins for Application in BNCT**

Michael W. Easson, Frank R. Fronczek, Timothy Jensen and M. Graça H. Vicente

Department of Chemistry, Louisiana State University, Baton Rouge, LA 70803, USA

## Table of Contents

|                                                    |   |
|----------------------------------------------------|---|
| HRMS (ESI).....                                    | 2 |
| Combined fluorescence emission spectra.....        | 8 |
| Dark cytotoxicity.....                             | 9 |
| Calculated intracellular boron levels at 24 h..... | 9 |

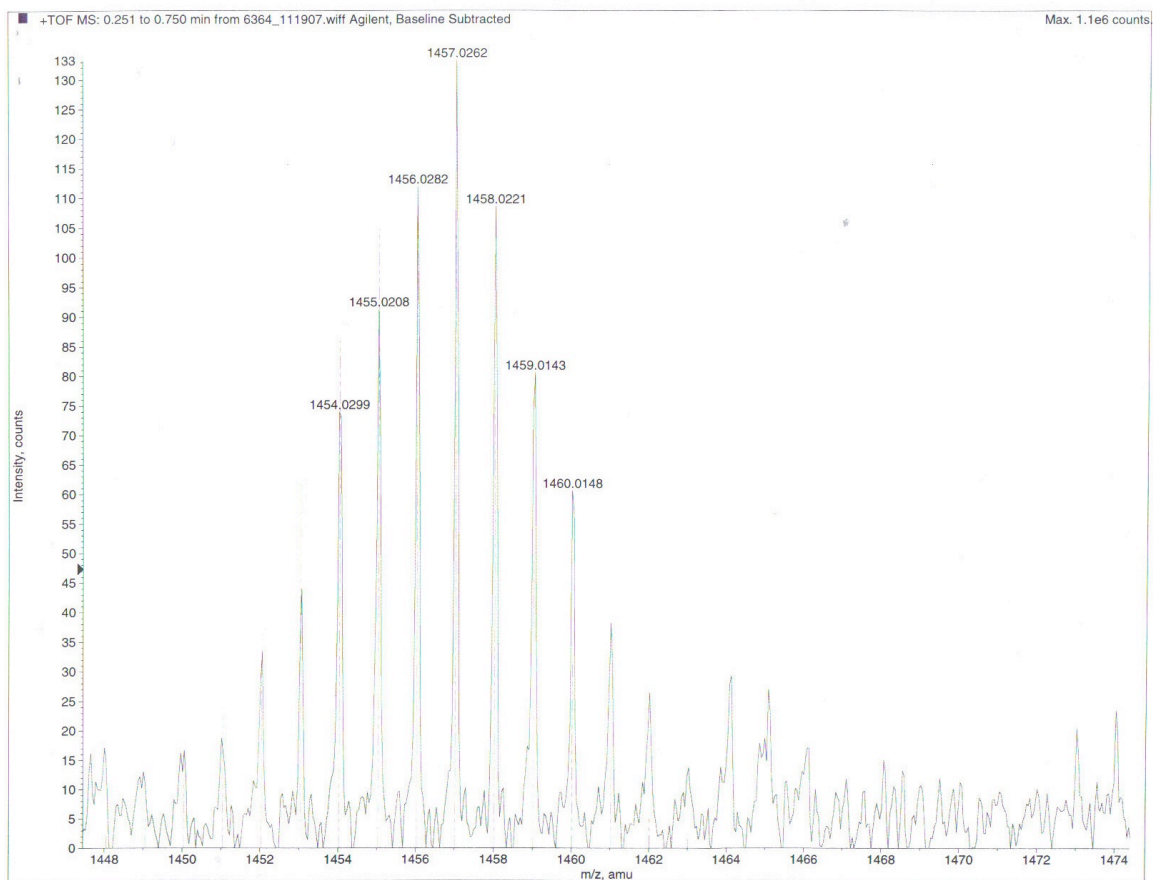

Figure 1. HRMS (ESI) for porphyrin **5d**; observed (solid line), calculated (dot line).

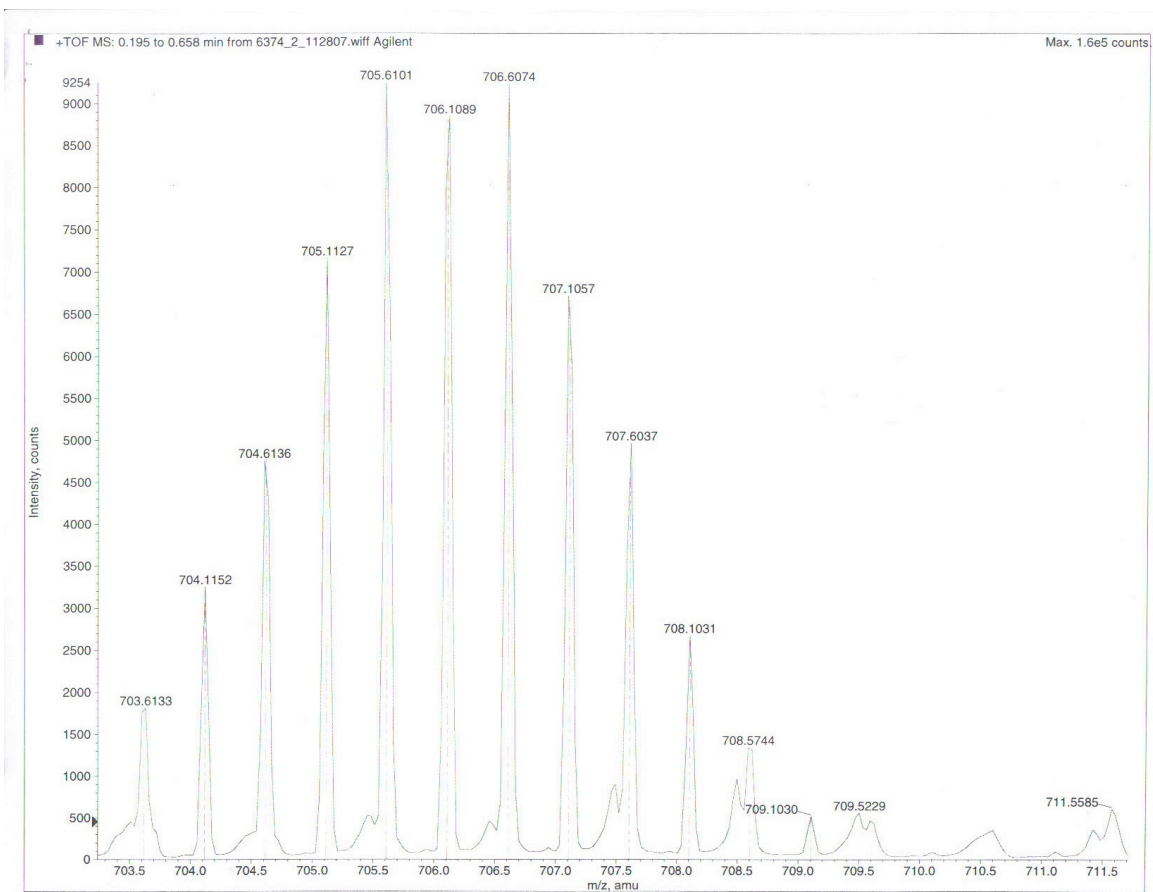

Figure 2. HRMS (ESI) for porphyrin **6c**; observed (solid line), calculated (dot line).

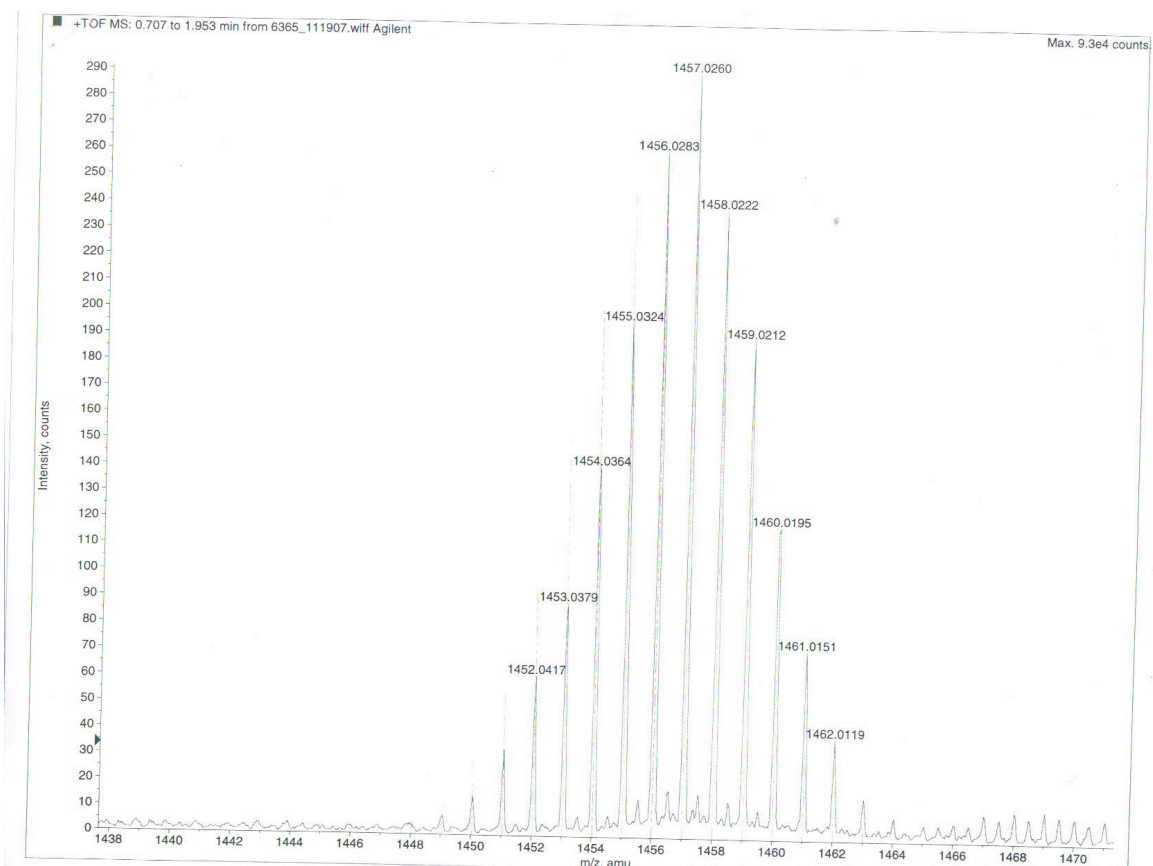

Figure 3. HRMS (ESI) for porphyrin **6d**; observed (solid line), calculated (dot line).

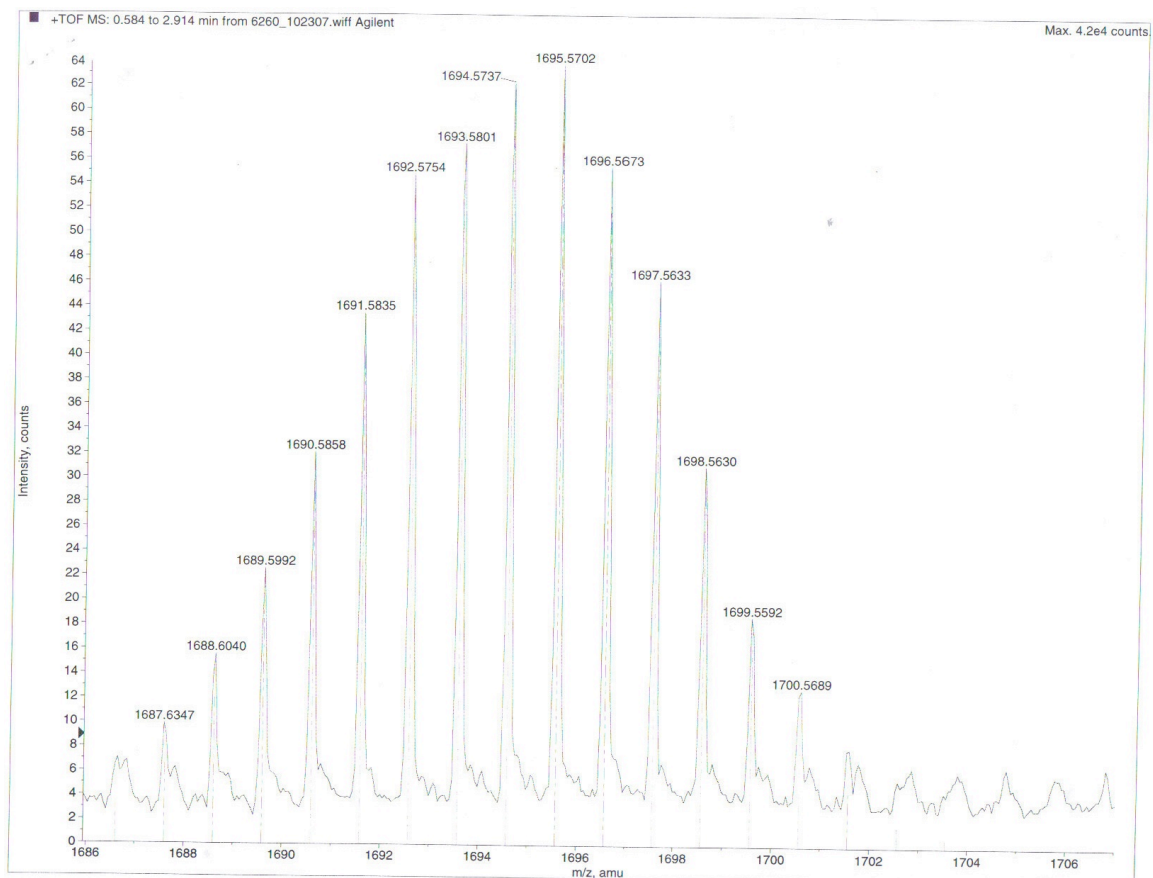

Figure 4. HRMS (ESI) for porphyrin **7c**; observed (solid line), calculated (dot line).

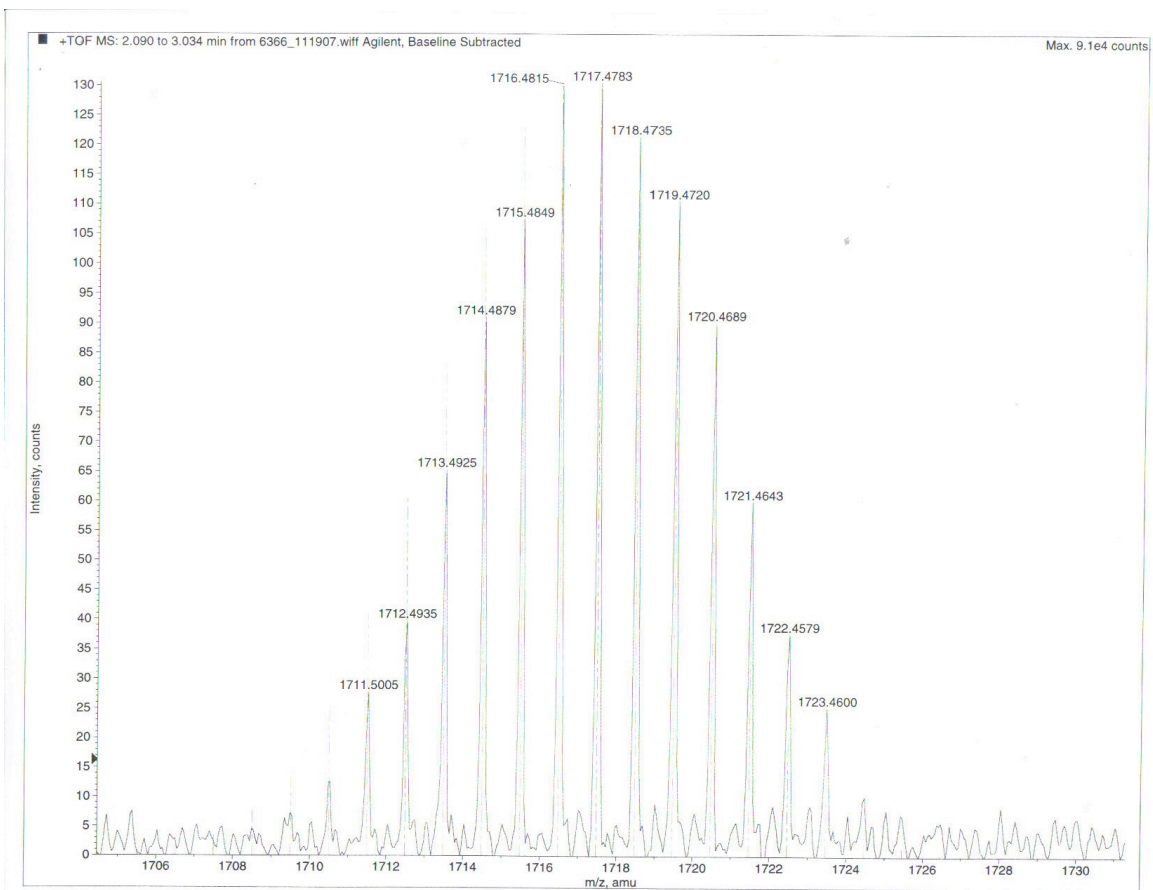

Figure 5. HRMS (ESI) for porphyrin **7d**; observed (solid line), calculated (dot line).

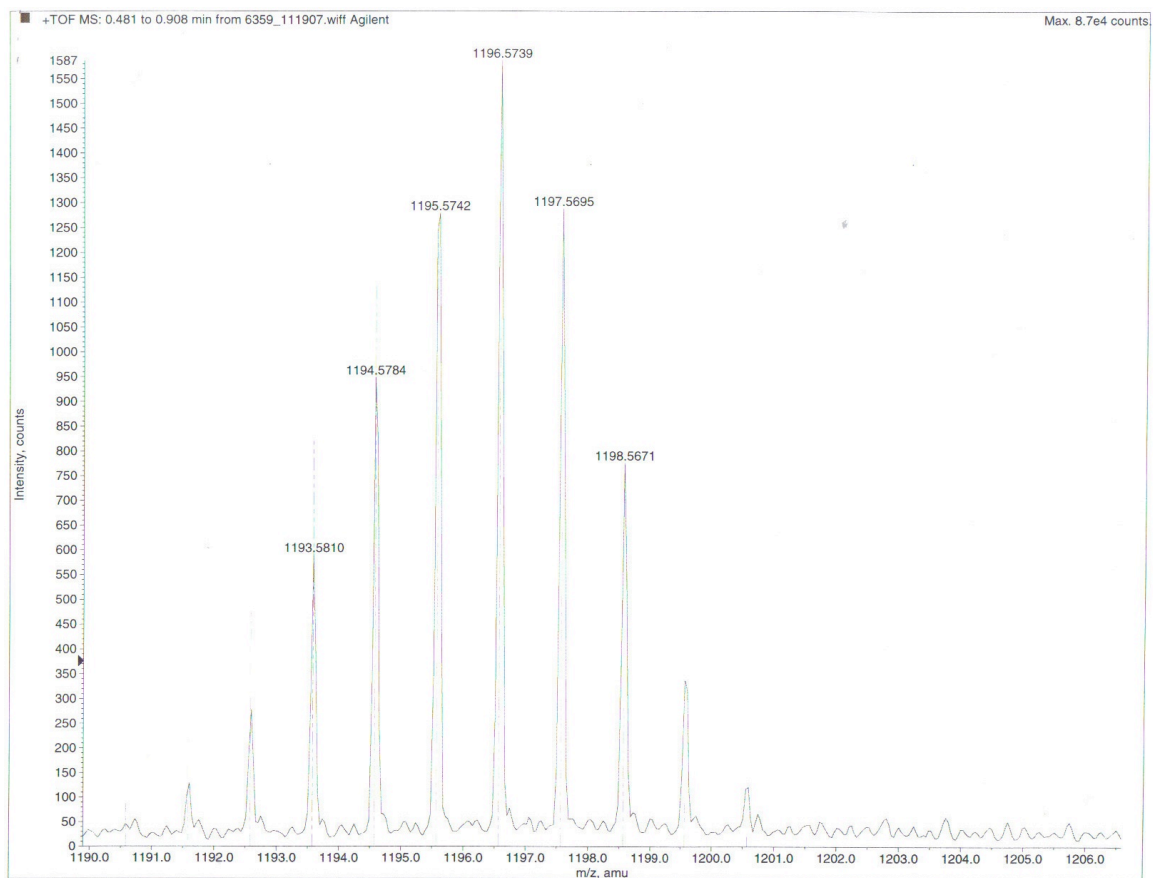

Figure 6. HRMS (ESI) for porphyrin **8d**; observed (solid line), calculated (dot line).

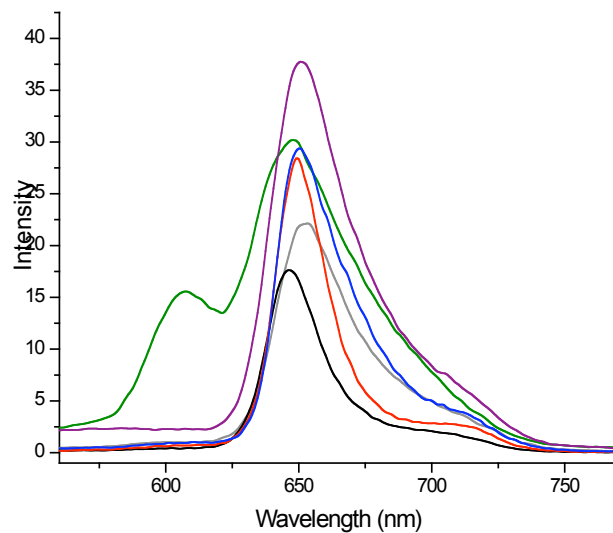

Figure 7. Fluorescence emission of porphyrins **5d** (gray), **6c** (purple), **6d** (black), **7c** (blue), **7d** (red), and **8d** (green) at  $1 \times 10^{-6}$  M in freshly prepared HEPES buffer (20 mM, pH 7.4) containing 1% DMSO. Excitation at 420 nm.



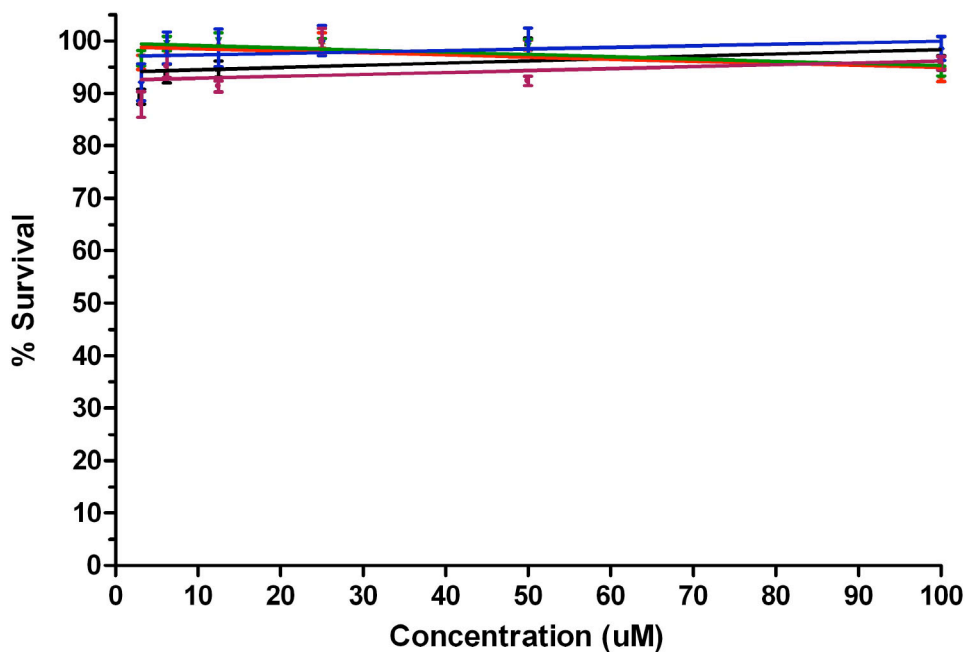

Figure 8. Dark cytotoxicity of porphyrins **6c** (purple), **6d** (black), **7c** (blue), **7d** (red) and **8d** (green) toward HEP2 cells using the Cell Titer Blue assay.

Table 1. Calculated  $\mu\text{g B/g}$  for each porphyrin after 24 h uptake by T98G cells

| <b>Porphyrin</b> | $\mu\text{g at 24 h}$ | <b>% B by weight</b> | $\mu\text{g B/g}$ |
|------------------|-----------------------|----------------------|-------------------|
| <b>6c</b>        | $0.025 \pm 0.002$     | 26                   | $147.4 \pm 15.1$  |
| <b>6d</b>        | $0.018 \pm 0.002$     | 30                   | $111.8 \pm 5.2$   |
| <b>7c</b>        | $0.010 \pm 0.004$     | 36                   | $92.6 \pm 16.2$   |
| <b>7d</b>        | $0.025 \pm 0.003$     | 38                   | $220.0 \pm 35.0$  |
| <b>8d</b>        | $0.027 \pm 0.001$     | 18                   | $108.8 \pm 10.3$  |
